# Supplementary material
Source: PubMed Central journal article supplement (PMC6045463)
Supplement: NIHMS939841-supplement-2.pdf [file NIHMS939841-supplement-2.pdf]

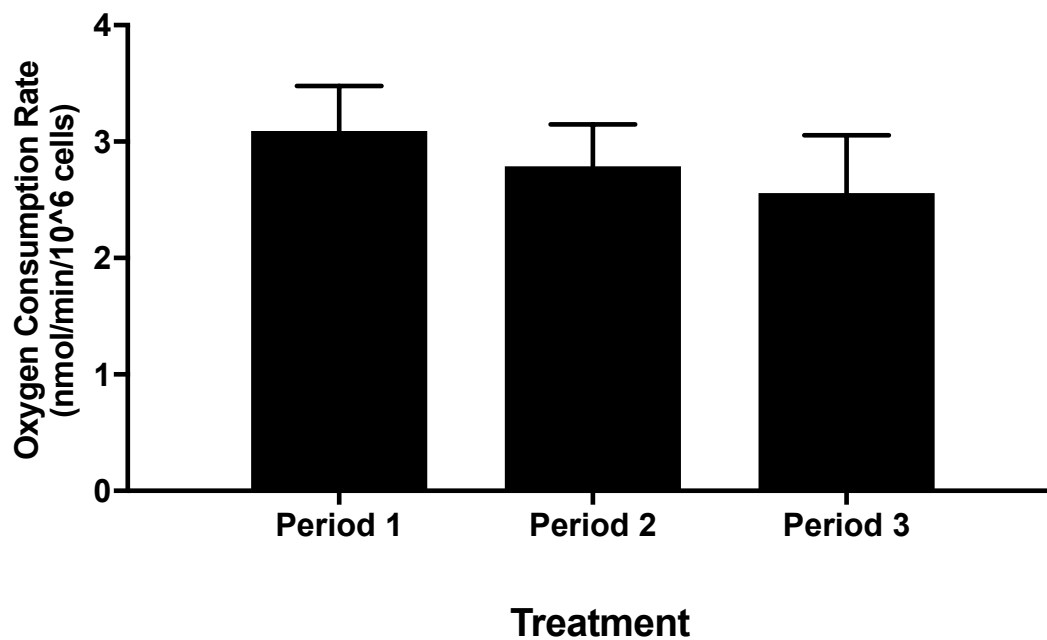

**Supplemental 1:** Oxygen consumption rates in Min6 cells over repeated measures. Oxygen consumption rates were determined for Min6 (n=20) in complete media (RPMI media at 20mM glucose) and evaluated for repeated measures up to 1 hour per experiment. Y-axis corresponds to oxygen consumption rate ( $\pm$ SEM, nmol/min/ $1 \times 10^6$  cells) and the x-axis corresponds to the average of two consecutive slopes in each experimental period. Average OCR of vehicle controls is presented for: baseline 0-25 minutes, 1st treatment period 25-45 minutes, and 2nd treatment period 45-60 minutes.
